# Supplementary material for: GALA: an international multicentre randomised trial comparing general anaesthesia versus local anaesthesia for carotid surgery
Source: Trials. 2008 May 21;9:28. doi: 10.1186/1745-6215-9-28 (PMC2413207; doi:10.1186/1745-6215-9-28)
Supplement: Additional file 2 — Hospital discharge or 7 day post-surgery follow-up form. The GALA trial post-surgery data collection form. [file 1745-6215-9-28-S2.pdf]

# GALA GENERAL ANAESTHESIA vs LOCAL ANAESTHESIA FOR CAROTID SURGERY

## HOSPITAL DISCHARGE OR 7 DAY POST-SURGERY FOLLOW-UP FORM

**To the surgeon and anesthetist:** Please complete questions 1-29 (pages 1, 2 & 3) as soon as you have finished the operation. The other questions should be answered at hospital discharge, or seven days post-surgery or death whichever is soonest. If this patient is no longer going to have surgery please give details of any anaesthetic given and complete questions 1 to 4 (page 1), and 30 to 38 (page 3) together with the contact details (page 4).

**HOSPITAL CODE NUMBER:**  or Hospital name |

### PATIENT DETAILS:

Family name: |

First names: |  | Hospital number |

Date of birth: \_\_\_\_/\_\_\_\_/\_\_\_\_ (dd/mm/yyyy)

### SURGERY DETAILS:

1. Was this patient admitted for surgery? **YES** ☐ *Please tick one box*  
**NO** ☐ → If NO please give reason:

2. Date of admission for surgery (dd/mm/yyyy) | \_\_\_\_/\_\_\_\_/\_\_\_\_ |

3. Has the patient taken any of the following in the 48 hours before surgery? *Please tick appropriate box(s)*

|                         |                          |
|-------------------------|--------------------------|
| Aspirin                 | <input type="checkbox"/> |
| Clopidogrel             | <input type="checkbox"/> |
| Dipyridamole            | <input type="checkbox"/> |
| Warfarin                | <input type="checkbox"/> |
| Other antiplatelet      | <input type="checkbox"/> |
| None of the above taken | <input type="checkbox"/> |

 → Name of drug: 

4. Was carotid surgery carried out? **YES** ☐ *Please tick one box*  
**NO** ☐

**If NO please give the reason below:** (then please answer questions 30 – 38 on p 3 and the contact details on p 4)

5. Date of carotid surgery: (dd/mm/yyyy) | \_\_\_\_/\_\_\_\_/\_\_\_\_ |

6. Side of carotid surgery: **Right** ☐ *Please tick one box*  
**Left** ☐

7. Type of surgery: **Conventional** ☐ *Please tick one box*  
**Eversion** ☐  
**Other** ☐ If **Other** please say surgery type |

8. Duration of surgery: (skin to skin time) |  | minutes

9. Shunt used? **YES** ☐ **NO** ☐ If shunt was used please give reason below:

|                                  |                                     |                                    |                                                |
|----------------------------------|-------------------------------------|------------------------------------|------------------------------------------------|
| 10. Patch used?                  | <b>YES</b> <input type="checkbox"/> | <b>NO</b> <input type="checkbox"/> |                                                |
| 11. Intraoperative heparin used? | <input type="checkbox"/>            | <input type="checkbox"/>           | → Dose:   <input type="text"/>   units         |
| 12. Heparin reversed?            | <input type="checkbox"/>            | <input type="checkbox"/>           | → Dose:   <input type="text"/>   mgs Protamine |

13. Weight of patient: |  | pounds or |  | kgs **Actual weight/ Estimated weight (delete as appropriate)**

**Please turn over/**

Version 5: 14/02/05

**GENERAL ANAESTHESIA:**Please Note: **ONLY** answer questions 14 to 18 if this was the principal method of anaesthesia.

|                                                   | YES                      | NO                       |
|---------------------------------------------------|--------------------------|--------------------------|
| 14. General anaesthesia used?                     | <input type="checkbox"/> | <input type="checkbox"/> |
| <i>(If YES complete questions 15 to 18 below)</i> |                          |                          |
| 15. Pre-medication?                               | <input type="checkbox"/> | <input type="checkbox"/> |
| 16. Maintenance technique:                        |                          |                          |
| - total IV anaesthesia?                           | <input type="checkbox"/> | <input type="checkbox"/> |
| - use of volatile agents?                         | <input type="checkbox"/> | <input type="checkbox"/> |
| - use of nitrous oxide?                           | <input type="checkbox"/> | <input type="checkbox"/> |
| - use of muscle relaxants?                        | <input type="checkbox"/> | <input type="checkbox"/> |
| 17. Did blood pressure require manipulation up?   | <input type="checkbox"/> | <input type="checkbox"/> |
| 18. Did blood pressure require manipulation down? | <input type="checkbox"/> | <input type="checkbox"/> |

**LOCAL ANAESTHESIA:**Please Note: **ONLY** answer questions 19 to 28 if this was the principal method of anaesthesia.

|                                                   | YES                      | NO                       |
|---------------------------------------------------|--------------------------|--------------------------|
| 19. Local anaesthesia used?                       | <input type="checkbox"/> | <input type="checkbox"/> |
| <i>If YES complete questions 20 to 28 below</i>   |                          |                          |
| 20. Pre-medication?                               | <input type="checkbox"/> | <input type="checkbox"/> |
| 21. Local infiltration used for anaesthesia?      | <input type="checkbox"/> | <input type="checkbox"/> |
| 22. Cervical plexus block used?                   | <input type="checkbox"/> | <input type="checkbox"/> |
| 23. Additional intra-operative local anaesthetic? | <input type="checkbox"/> | <input type="checkbox"/> |
| 24. Did blood pressure require manipulation up?   | <input type="checkbox"/> | <input type="checkbox"/> |
| 25. Did blood pressure require manipulation down? | <input type="checkbox"/> | <input type="checkbox"/> |
| 26. Intra-operative sedative?                     | <input type="checkbox"/> | <input type="checkbox"/> |
| 27. Intra-operative analgesia?                    | <input type="checkbox"/> | <input type="checkbox"/> |
| 28. Conversion to general anaesthesia?            | <input type="checkbox"/> | <input type="checkbox"/> |

**FOR ALL PATIENTS:**

|                                                                            | YES                      | NO                       |
|----------------------------------------------------------------------------|--------------------------|--------------------------|
| 29. Was the type of anaesthesia used the same as allocated at trial entry? | <input type="checkbox"/> | <input type="checkbox"/> |

If **NO** please give the reasons in the space below:

NAME OF SURGEON CARRYING OUT THE OPERATION | \_\_\_\_\_ |

PLEASE INDICATE THE OPERATING SURGEON'S GRADE (tick one box)

|            |                          |                                                                                                                                                                               |
|------------|--------------------------|-------------------------------------------------------------------------------------------------------------------------------------------------------------------------------|
| Trainee    | <input type="checkbox"/> |                                                                                                                                                                               |
| Consultant | <input type="checkbox"/> | (Consultant = an individual who has completed their training and is capable of doing the procedure with no supervision, and who has an appropriate specialist qualification.) |
| Other      | <input type="checkbox"/> | If you tick OTHER please say what grade below:<br>  _____                                                                                                                     |

NAME OF MOST SENIOR SURGEON PRESENT AT THE OPERATING TABLE | \_\_\_\_\_ |

PLEASE INDICATE THE GRADE OF THE MOST SENIOR SURGEON PRESENT AT THE OPERATING TABLE (tick one box)

|            |                          |                                                                                                                                                                               |
|------------|--------------------------|-------------------------------------------------------------------------------------------------------------------------------------------------------------------------------|
| Trainee    | <input type="checkbox"/> |                                                                                                                                                                               |
| Consultant | <input type="checkbox"/> | (Consultant = an individual who has completed their training and is capable of doing the procedure with no supervision, and who has an appropriate specialist qualification.) |
| Other      | <input type="checkbox"/> | If you tick OTHER please say what grade below:<br>  _____                                                                                                                     |

**Please turn over/**

NAME OF ANAESTHETIST ADMINISTERING ANAESTHESIA | \_\_\_\_\_ |

PLEASE INDICATE THE ADMINISTERING ANESTHETIST'S GRADE (tick one box)

Trainee ☐Consultant ☐

(Consultant = an individual who has completed their training and is capable of doing the procedure with no supervision, and who has an appropriate specialist qualification.)

Other ☐

Please state what grade | \_\_\_\_\_ |

NAME OF MOST SENIOR ANAESTHETIST PRESENT IN THE OPERATING THEATRE | \_\_\_\_\_ |

PLEASE INDICATE THE GRADE OF THE MOST SENIOR ANAESTHETIST PRESENT IN THE OPERATING THEATRE (tick one box)

Trainee ☐Consultant ☐

(Consultant = an individual who has completed their training and is capable of doing the procedure with no supervision, and who has an appropriate specialist qualification.)

Other ☐

Please state what grade | \_\_\_\_\_ |

**Please complete the rest of this form  
at hospital discharge, or 7 days post-surgery or death, whichever occurs first.**

**COMPLICATIONS:**

Since randomisation has the patient had any of the following? (Please tick all that apply)

|                                                         | YES                      | NO                       | For any YES answers please<br>give the date below: |
|---------------------------------------------------------|--------------------------|--------------------------|----------------------------------------------------|
| 30. Stroke of any type ( > 24 hours)? *                 | <input type="checkbox"/> | <input type="checkbox"/> | ____ /____ /____  (dd/mm/yyyy)                     |
| 31. Transient ischaemic attack (brain) ( < 24 hours)? * | <input type="checkbox"/> | <input type="checkbox"/> | ____ /____ /____  (dd/mm/yyyy)                     |
| 32. Retinal infarction ( > 24 hours)? *                 | <input type="checkbox"/> | <input type="checkbox"/> | ____ /____ /____  (dd/mm/yyyy)                     |
| 33. Amaurosis fugax ( < 24 hours)? *                    | <input type="checkbox"/> | <input type="checkbox"/> | ____ /____ /____  (dd/mm/yyyy)                     |
| 34. Myocardial infarction? *                            | <input type="checkbox"/> | <input type="checkbox"/> | ____ /____ /____  (dd/mm/yyyy)                     |
| 35. New or worsening angina?                            | <input type="checkbox"/> | <input type="checkbox"/> | ____ /____ /____  (dd/mm/yyyy)                     |
| 36. New arrhythmia requiring treatment?                 | <input type="checkbox"/> | <input type="checkbox"/> | ____ /____ /____  (dd/mm/yyyy)                     |
| 37. New or worsening heart failure?                     | <input type="checkbox"/> | <input type="checkbox"/> | ____ /____ /____  (dd/mm/yyyy)                     |
| 38. Has this patient died? *                            | <input type="checkbox"/> | <input type="checkbox"/> | ____ /____ /____  (dd/mm/yyyy)                     |

If this patient has died please give cause of death below:

Cause of death:

\* If you have answered Yes to any question above with an asterisk (\*) please complete a MAJOR EVENT FORM and send it to the GALA Trial Office

Between the induction of anaesthesia and today's date did the patient have any of the following?

|                                                 | YES                      | NO                       |
|-------------------------------------------------|--------------------------|--------------------------|
| 39. Deep vein thrombosis?                       | <input type="checkbox"/> | <input type="checkbox"/> |
| 40. Pulmonary embolism?                         | <input type="checkbox"/> | <input type="checkbox"/> |
| 41. Retention of urine?                         | <input type="checkbox"/> | <input type="checkbox"/> |
| 42. Chest infection?                            | <input type="checkbox"/> | <input type="checkbox"/> |
| 43. Wound haematoma?                            | <input type="checkbox"/> | <input type="checkbox"/> |
| 44. Wound infection?                            | <input type="checkbox"/> | <input type="checkbox"/> |
| 45. Any other medical or surgical complication? | <input type="checkbox"/> | <input type="checkbox"/> |

**Q45 - If YES please describe below** ↴

46. Did this patient require re-operation?

 YES ☐  
 NO ☐

If YES please give the reason ↴

**Please turn over/**

**PLACE AND DURATION OF HOSPITAL STAY:**

47. Number of hours spent in recovery room after surgery  hours
48. Number of hours spent in Intensive Therapy Unit after surgery (Level 3)  hours Level 3 - Intensive Care. Nurse patient ratio 1:1, with dedicated senior and trainee medical staff.
49. Number of hours spent in High Dependency Unit after surgery (Level 2, Level 1)  hours Level 2 - High Dependency with organ support, but not mechanical ventilation. Nurse patient ratio 1:2, with dedicated senior and trainee medical staff.  
Level 1 - HDU. Close monitoring. Nurse patient ratio 1:4. No dedicated medical staff.
50. Has this patient been discharged from hospital? YES   
NO
51. If YES give Date of discharge (dd/mm/yyyy) | \_\_\_\_/\_\_\_\_/\_\_\_\_ |

**OR**

If still in hospital, give Ward number or name:

Ward | \_\_\_\_\_ |

If still in hospital, give the name of the doctor responsible for their care

Dr | \_\_\_\_\_ |

**CONTACT DETAILS: PATIENT'S FULL POSTAL ADDRESS**(Please print clearly  
or attach a sticky label)

Post code

Telephone

**PATIENT'S FAMILY DOCTOR DETAILS**

Family Doctor's name

Family Doctor's full postal  
address

Post code

Telephone

**NAME OF COLLABORATOR COMPLETING  
THIS FORM**

| \_\_\_\_\_ |

**TODAY'S DATE**

| \_\_\_\_/\_\_\_\_/\_\_\_\_ | dd/mm/yyyy

**Please post or fax this form to:**GALA Trial Co-ordinator, Neurosciences Trials Unit, Bramwell Dott Building,  
Western General Hospital, Crewe Road, Edinburgh EH4 2XU.Fax: + 44 131 332 5150  
(an envelope is provided)
