# Supplementary material for: GALA: an international multicentre randomised trial comparing general anaesthesia versus local anaesthesia for carotid surgery
Source: Trials. 2008 May 21;9:28. doi: 10.1186/1745-6215-9-28 (PMC2413207; doi:10.1186/1745-6215-9-28)
Supplement: Additional file 3 — One month post-surgery follow-up form. The GALA trial one-month post-surgery data collection form, for use at examination by independent neurologist. [file 1745-6215-9-28-S3.pdf]

# GALA GENERAL ANAESTHESIA vs LOCAL ANAESTHESIA FOR CAROTID SURGERY

## ONE MONTH POST-SURGERY FOLLOW-UP FORM

To the physician: Please complete this form for your patient at their follow-up appointment  
30 DAYS after their carotid surgery

HOSPITAL CODE NUMBER  | \_\_\_\_\_

Hospital name if code not available

### PATIENT DETAILS:

Family name: | \_\_\_\_\_

First names: | \_\_\_\_\_ Hospital number | \_\_\_\_\_

Date of birth: dd | \_\_\_\_\_ / mm | \_\_\_\_\_ / yyyy | \_\_\_\_\_

### DISCHARGE DETAILS

1. Has this patient been discharged from hospital? YES ☐ (Please tick one box)  
NO ☐

If YES give Date of discharge (dd/mm/yyyy) | \_\_\_\_\_ / \_\_\_\_\_ / \_\_\_\_\_

### OR

If still in hospital, give Ward number or name: Ward | \_\_\_\_\_

If still in hospital, give the name of the doctor responsible  
for their care

Dr | \_\_\_\_\_

2. Did the patient require re-operation? YES ☐  
NO ☐

If YES please give the reason below:

### COMPLICATIONS

Between randomisation and today's appointment date (including the pre-, peri-, and post-operative periods) did this patient have any of the following? (Please answer Yes or No for each question)

|                                                               | YES                      | NO                       | For any YES answers please give the date below: |
|---------------------------------------------------------------|--------------------------|--------------------------|-------------------------------------------------|
| 3. Stroke of any type (more than 24 hours)? *                 | <input type="checkbox"/> | <input type="checkbox"/> | → 3.   _____ / _____ / _____   (dd/mm/yyyy)     |
| 4. Transient ischaemic attack (brain) (less than 24 hours)? * | <input type="checkbox"/> | <input type="checkbox"/> | → 4.   _____ / _____ / _____   (dd/mm/yyyy)     |
| 5. Retinal infarction (more than 24 hours)? *                 | <input type="checkbox"/> | <input type="checkbox"/> | → 5.   _____ / _____ / _____   (dd/mm/yyyy)     |
| 6. Amaurosis fugax (less than 24 hours)? *                    | <input type="checkbox"/> | <input type="checkbox"/> | → 6.   _____ / _____ / _____   (dd/mm/yyyy)     |
| 7. Myocardial infarction? *                                   | <input type="checkbox"/> | <input type="checkbox"/> | → 7.   _____ / _____ / _____   (dd/mm/yyyy)     |
| 8. New or worsening angina?                                   | <input type="checkbox"/> | <input type="checkbox"/> | → 8.   _____ / _____ / _____   (dd/mm/yyyy)     |
| 9. New arrhythmia requiring treatment?                        | <input type="checkbox"/> | <input type="checkbox"/> | → 9.   _____ / _____ / _____   (dd/mm/yyyy)     |
| 10. New or worsening heart failure?                           | <input type="checkbox"/> | <input type="checkbox"/> | → 10.   _____ / _____ / _____   (dd/mm/yyyy)    |
| 11. Has this patient died? *                                  | <input type="checkbox"/> | <input type="checkbox"/> | → 11.   _____ / _____ / _____   (dd/mm/yyyy)    |

If this patient has died please give cause of death below:

\* If you have answered Yes to any question above with an asterisk (\*) please complete a MAJOR EVENT FORM and send it to the GALA Trial Office

Please turn over/

Between the induction of anaesthesia and today's appointment date did the patient have any of the following?

(Please answer Yes or No for each question)

|                                                                        | YES                      | NO                       |
|------------------------------------------------------------------------|--------------------------|--------------------------|
| 12. Deep vein thrombosis?                                              | <input type="checkbox"/> | <input type="checkbox"/> |
| 13. Pulmonary embolism?                                                | <input type="checkbox"/> | <input type="checkbox"/> |
| 14. Retention of urine?                                                | <input type="checkbox"/> | <input type="checkbox"/> |
| 15. Chest infection?                                                   | <input type="checkbox"/> | <input type="checkbox"/> |
| 16. Wound haematoma?                                                   | <input type="checkbox"/> | <input type="checkbox"/> |
| 17. Wound infection?                                                   | <input type="checkbox"/> | <input type="checkbox"/> |
| 18. Headache ipsilateral to surgery?                                   | <input type="checkbox"/> | <input type="checkbox"/> |
| 19. Lower cranial nerve injury (weak face or tongue, hoarseness etc.)? | <input type="checkbox"/> | <input type="checkbox"/> |

Q19 - If **YES** please describe below ➡

|                                                 | YES                      | NO                       |
|-------------------------------------------------|--------------------------|--------------------------|
| 20. Any other medical or surgical complication? | <input type="checkbox"/> | <input type="checkbox"/> |

Q20 - If **YES** please describe below ➡

NAME OF INDEPENDENT STROKE PHYSICIAN OR  
NEUROLOGIST COMPLETING THIS FORM:

| \_\_\_\_\_ |

TODAY'S APPOINTMENT DATE:

(dd/mm/yyyy)

| \_\_\_\_ / \_\_\_\_ / \_\_\_\_ |

**Please post or fax this form to:**

GALA Trial Co-ordinator, Neurosciences Trials Unit, Bramwell Dott Building,  
Western General Hospital, Edinburgh EH4 2XU.

Fax: +44 131 332 5150

(an envelope is provided)
